# Supplementary material for: Use of an [EMIM][OAc]/GVL-based organic electrolyte solvent to engineer chitosan into a nanocomposite organic ionogel electrolyte for flexible supercapacitors
Source: Royal Society of Chemistry journal article supplement (doi:10.1039/d2gc04019k), 2023-01-01
Supplement: d2gc04019k2.pdf [file d2gc04019k2.pdf]

## **Supporting Information**

### **Use of a [EMIM][OAc]/GVL-based organic electrolyte solvent to engineer chitosan into nanocomposite organic ionogel electrolyte for flexible supercapacitors**

Hailiang Sheng, Antai Zhu, Lihua Zhang\*, Jun Huang, Tongjun Yang, Shangdong Qin, Fazhi Zhang, Qinqin Xu, Haibo Xie\*

Department of Polymer Materials and Engineering, College of Materials and Metallurgy, Guizhou University, Guiyang 550025, China

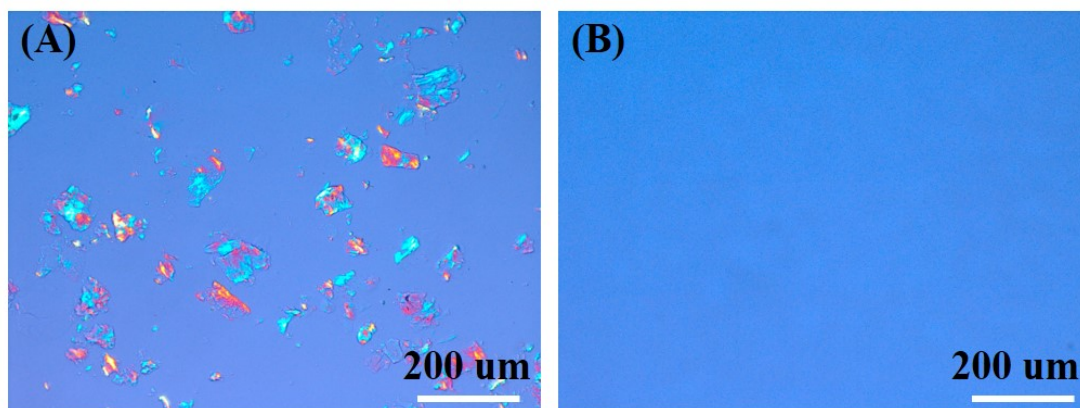

**Fig. S1** POM images of chitosan (A) suspended and (B) dissolved in [EMIM][OAc]/GVL-based OES ( $\chi_{ILs} = 0.5$ ).

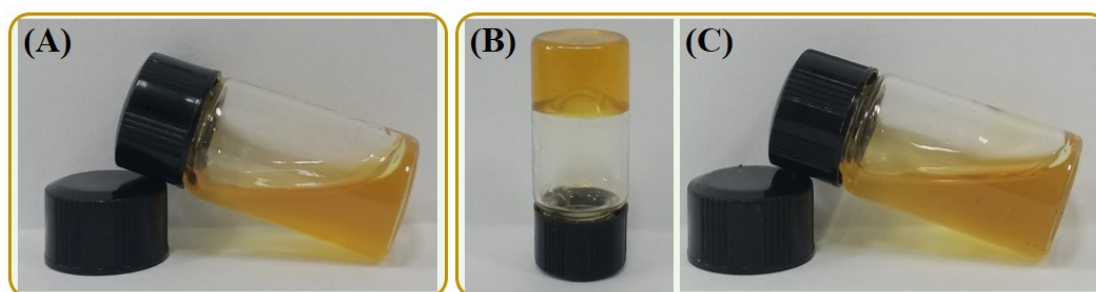

**Fig. S2** Pictures of (A) a 8 wt% chitosan solution in [EMIM][OAc]/GVL ( $\chi_{ILs} = 0.5$ ) at 25 °C, and chitosan/nano-SiO<sub>2</sub>/[EMIM][OAc]/GVL ( $\chi_{ILs} = 0.5$ ) system (chitosan, 8 wt%; nano-SiO<sub>2</sub>, 2 wt%) at (B) 25 °C and (C) 90 °C.

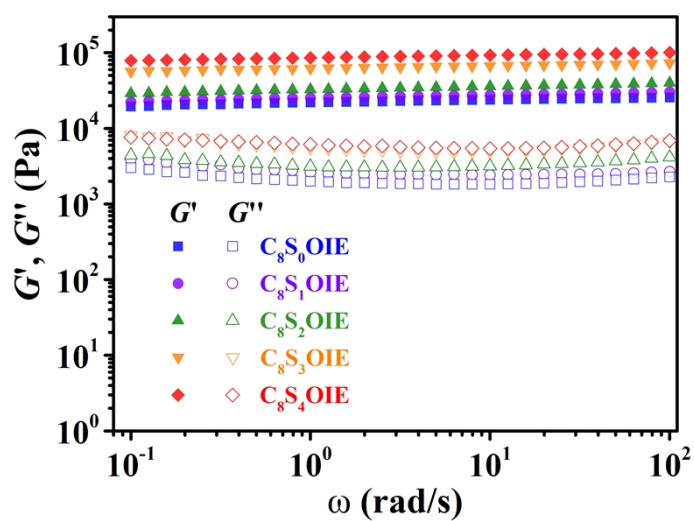

**Fig. S3** Frequency dependence of  $G'$  and  $G''$  for the C<sub>8</sub>S<sub>0</sub>OIE, C<sub>8</sub>S<sub>1</sub>OIE, C<sub>8</sub>S<sub>2</sub>OIE, C<sub>8</sub>S<sub>3</sub>OIE, and C<sub>8</sub>S<sub>4</sub>OIE samples.

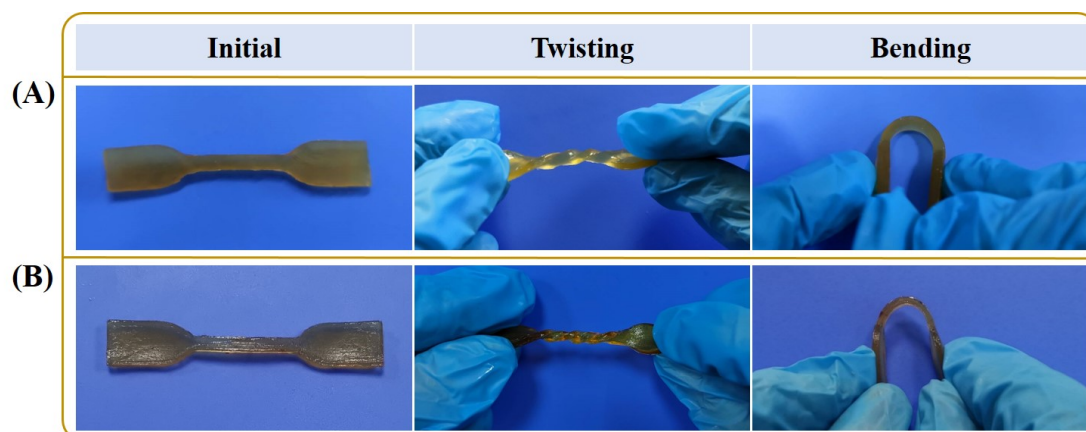

**Fig. S4** Photographic pictures of  $C_8S_2OIE$  with dog-bone shape under initial, twisting and bending states at (A)  $-25\text{ }^\circ\text{C}$  and (C)  $80\text{ }^\circ\text{C}$ .

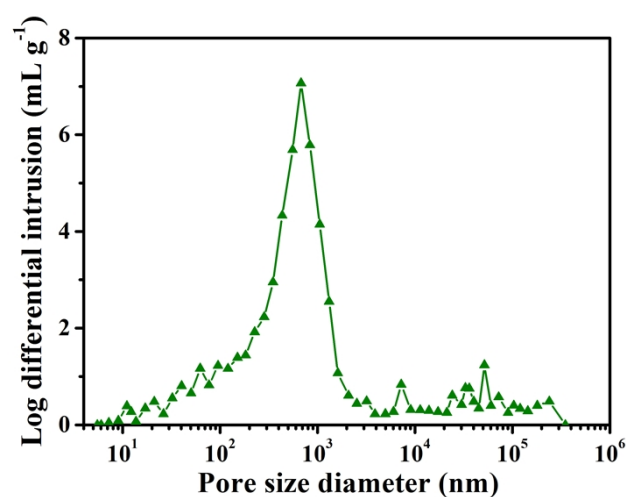

**Fig. S5** Pore size distribution of  $C_8S_2OIE$ , determined by automatic mercury intrusion porosimeter.

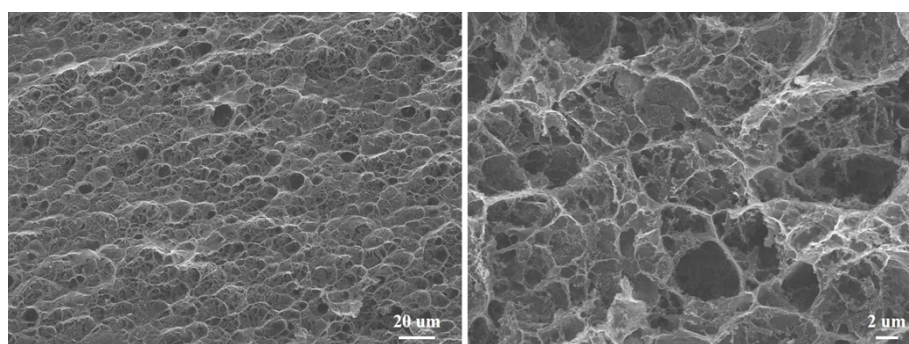

**Fig. S6** Cross-sectional SEM images of Cryo- $C_8S_4OIE$ .

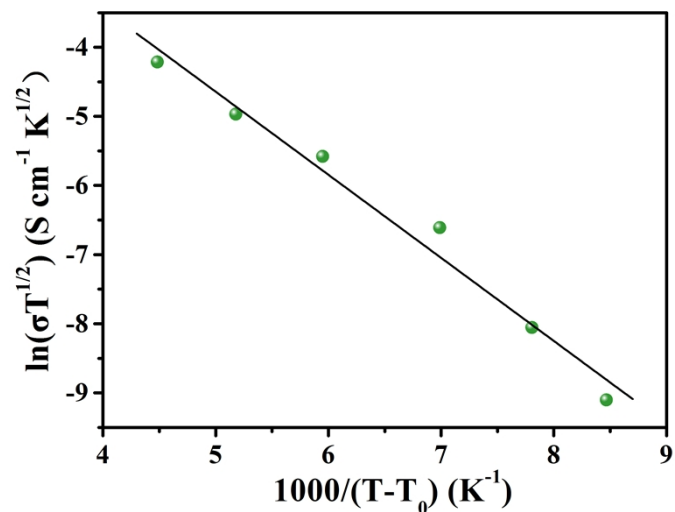

**Fig. S7** VTF fitting curve of the conductivity of the  $C_8S_2OIE$  sample.

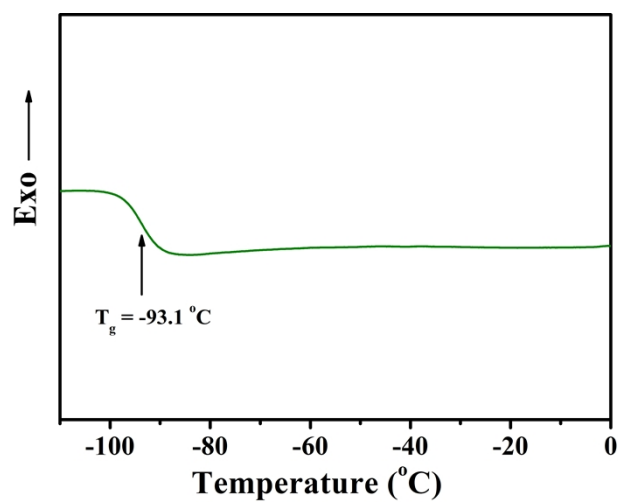

**Fig. S8** DSC thermogram of  $C_8S_2OIE$ .

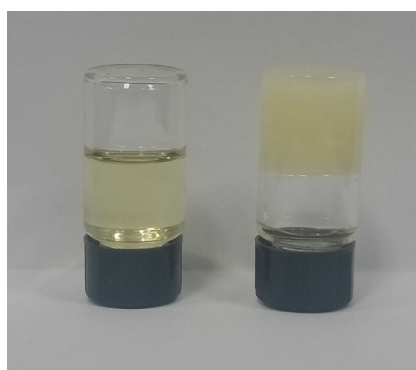

**Fig. S9** Photographic pictures of  $[EMIM][OAc]/GVL$  ( $\chi_{ILs} = 0.5$ ) system (left) and  $[EMIM][OAc]$  (right) after kept at  $-25 \text{ }^\circ\text{C}$  for 24 h.

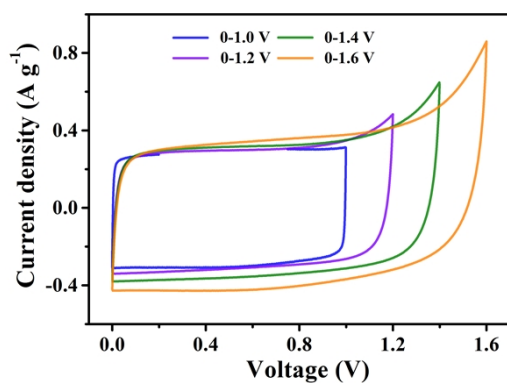

**Fig. S10** CV curves with different voltage windows at 5 mV s<sup>-1</sup> for C<sub>8</sub>S<sub>2</sub>OIE-based supercapacitor.

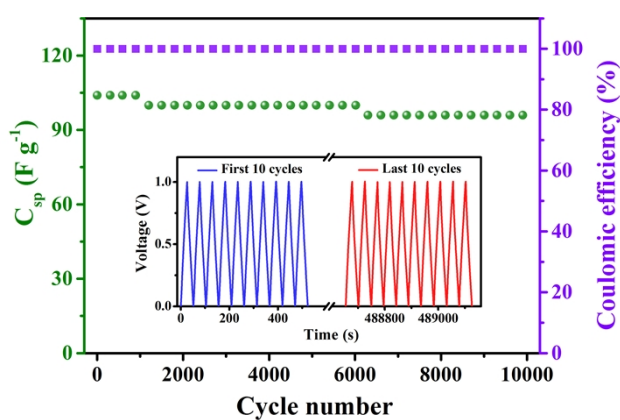

**Fig. S11** Cyclic stability at 80 °C (2 A g<sup>-1</sup>) of the C<sub>8</sub>S<sub>2</sub>OIE-based supercapacitor.

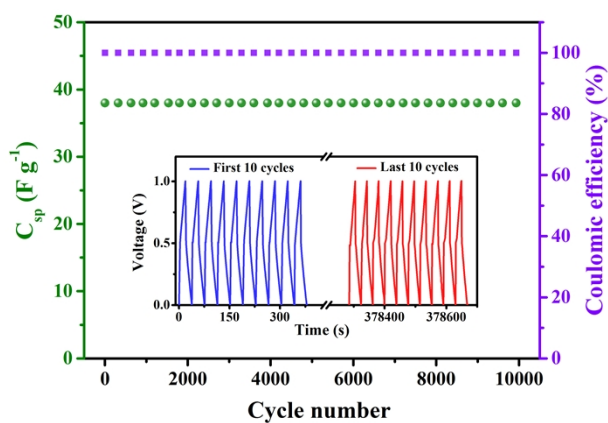

**Fig. S12** Cyclic stability at -25 °C (1 A g<sup>-1</sup>) of the C<sub>8</sub>S<sub>2</sub>OIE-based supercapacitor.

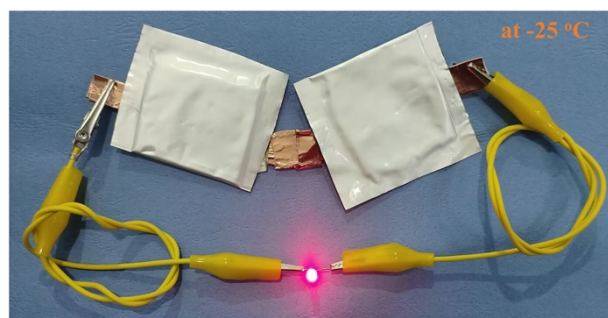

**Fig. S13** LED bulb lighting test by the  $C_8S_2OIE$ -based supercapacitor at  $-25\text{ }^\circ\text{C}$ .
